# Supplementary material for: Quantifying the Effect of Supplementation with Algae and Its Extracts on Glycolipid Metabolism: A Meta-Analysis of Randomized Controlled Trials
Source: PubMed Central journal article supplement (PMC7352414; doi:10.3390/nu12061712), 2020-06-08
Supplement: nutrients-12-01712-s001.pdf [file nutrients-12-01712-s001.pdf]

Supplementary materials

A

|                           | Random sequence generation (selection bias) | Allocation concealment (selection bias) | Blinding of participants and personnel (performance bias) | Blinding of outcome assessment (detection bias) | Incomplete outcome data (attrition bias) | Selective reporting (reporting bias) | Other bias |
|---------------------------|---------------------------------------------|-----------------------------------------|-----------------------------------------------------------|-------------------------------------------------|------------------------------------------|--------------------------------------|------------|
| Akiko et al. (2016)       | +                                           | +                                       | +                                                         | ?                                               | ?                                        | ?                                    | +          |
| Alam et al. (2016)        | +                                           | +                                       | +                                                         | +                                               | -                                        | ?                                    | +          |
| Anitha et al. (2010)      | +                                           | -                                       | +                                                         | +                                               | -                                        | ?                                    | ?          |
| Diana et al. (2014)       | +                                           | +                                       | +                                                         | ?                                               | ?                                        | ?                                    | +          |
| Hong et al. (2015)        | +                                           | ?                                       | +                                                         | +                                               | ?                                        | ?                                    | +          |
| Jensen et al. (2016)      | +                                           | -                                       | +                                                         | -                                               | +                                        | ?                                    | ?          |
| Kim et al. (2016)         | -                                           | +                                       | +                                                         | ?                                               | +                                        | ?                                    | +          |
| Kim et al. (2019)         | +                                           | ?                                       | ?                                                         | ?                                               | +                                        | +                                    | +          |
| Kwak et al. (2012)        | +                                           | ?                                       | +                                                         | -                                               | +                                        | ?                                    | +          |
| Lee et al. (2008)         | +                                           | +                                       | +                                                         | +                                               | +                                        | +                                    | ?          |
| Maryam et al. (2015)      | +                                           | ?                                       | +                                                         | +                                               | ?                                        | ?                                    | +          |
| Merhrangiz et al. (2014)  | +                                           | +                                       | +                                                         | ?                                               | ?                                        | ?                                    | +          |
| Mikami et al. (2017)      | +                                           | ?                                       | +                                                         | ?                                               | -                                        | +                                    | ?          |
| Miyazawa et al. (2013)    | ?                                           | ?                                       | +                                                         | -                                               | -                                        | -                                    | ?          |
| Otsuki et al. (2015)      | +                                           | ?                                       | +                                                         | -                                               | ?                                        | ?                                    | ?          |
| Panahi et al. (2012)      | +                                           | ?                                       | -                                                         | ?                                               | -                                        | ?                                    | ?          |
| Parikh et al. (2001)      | +                                           | -                                       | +                                                         | +                                               | -                                        | -                                    | ?          |
| Park et al. (2008)        | +                                           | +                                       | +                                                         | +                                               | ?                                        | ?                                    | +          |
| Park et al. (2016)        | +                                           | +                                       | +                                                         | ?                                               | +                                        | ?                                    | +          |
| Ramamoorthy et al. (1996) | +                                           | -                                       | -                                                         | ?                                               | ?                                        | -                                    | ?          |
| Sakai et al. (2019)       | +                                           | +                                       | +                                                         | +                                               | +                                        | +                                    | +          |
| Samules et al. (2002)     | ?                                           | ?                                       | +                                                         | ?                                               | -                                        | -                                    | ?          |
| Sansawa et al. (2002)     | +                                           | -                                       | -                                                         | -                                               | -                                        | ?                                    | ?          |
| Sun et al. (2008)         | +                                           | +                                       | -                                                         | -                                               | -                                        | +                                    | ?          |
| Szulinska et al. (2017)   | +                                           | +                                       | +                                                         | +                                               | +                                        | +                                    | +          |
| Yousefi et al. (2018)     | +                                           | +                                       | +                                                         | +                                               | +                                        | +                                    | +          |
| Zeinalian et al. (2017)   | +                                           | +                                       | +                                                         | ?                                               | +                                        | +                                    | +          |

**B**

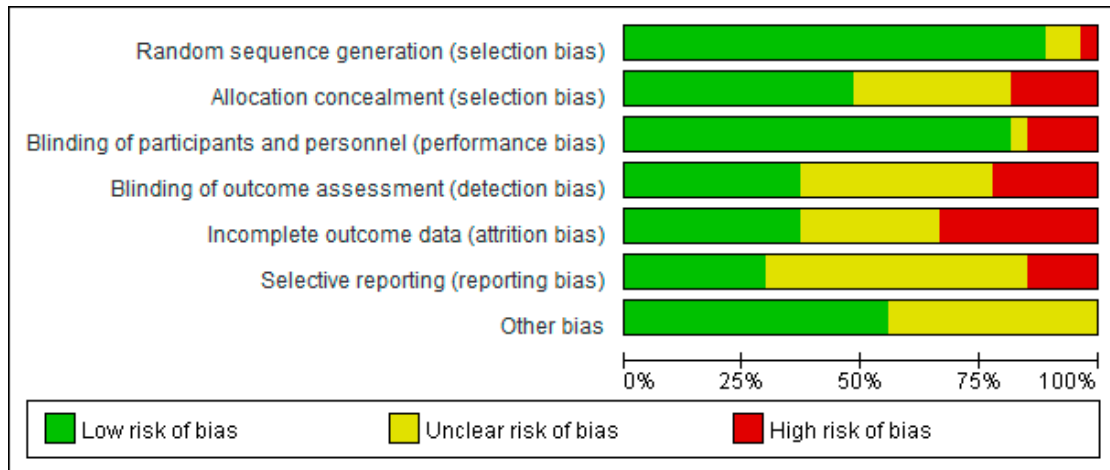

**Figure S1.** Quality assessment of the included studies. labeling an item as a “question mark” indicated an unclear or unknown risk of bias; labeling an item as a “negative sign” indicated a high risk of bias; labeling an item as a “positive sign” indicated a low risk of bias.

**A**

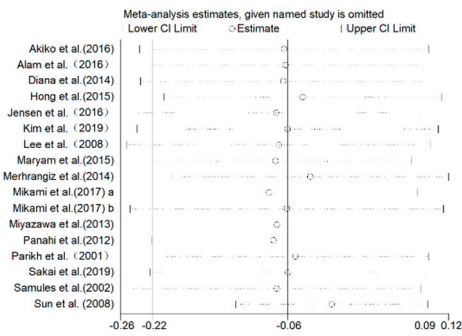

**B**

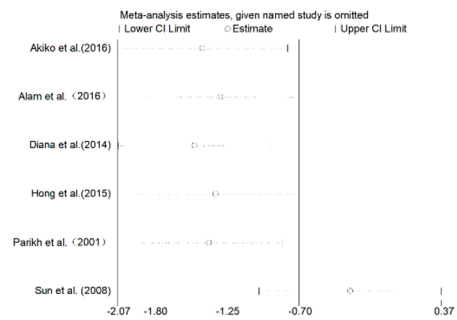

**C**

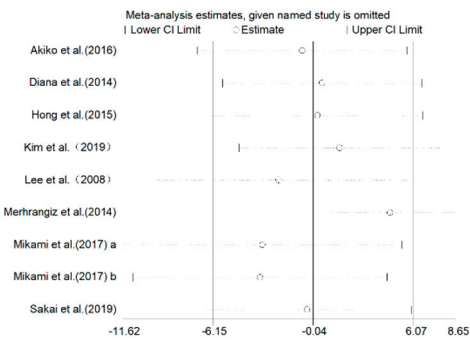

**D**

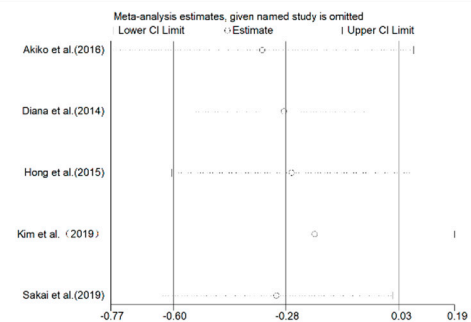

E

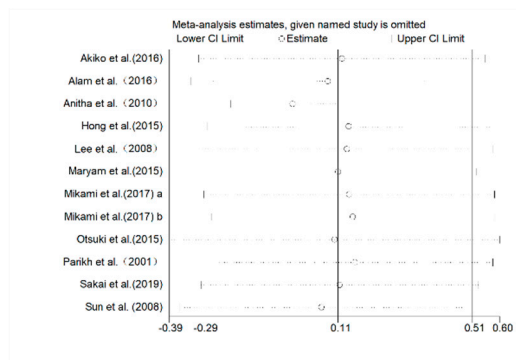

G

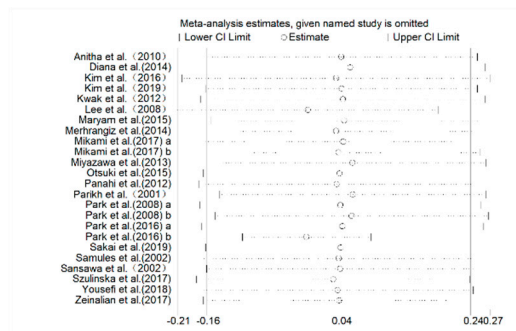

I

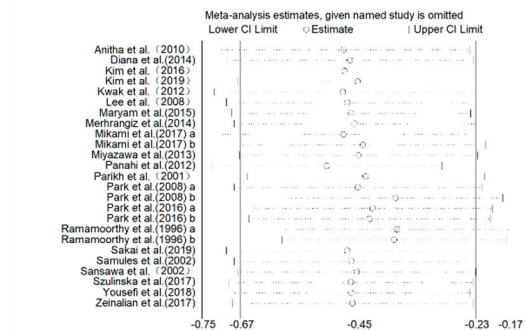

F

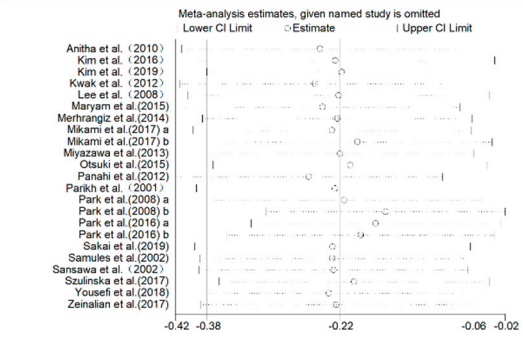

H

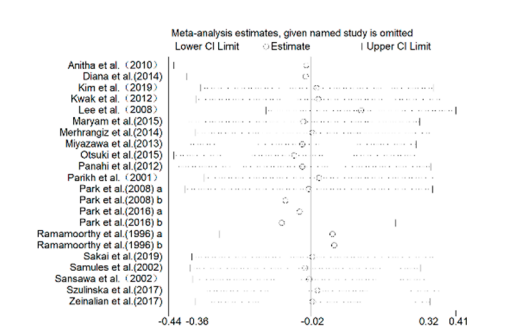

**Figure S2.** Sensitivity analysis was conducted on outcomes of FPG (A), 2hPBG (B), insulin (C), HOMA-IR (D), HbA1c (E), HDL-C (F), LDL-C (G), TG (H) and TC (I) using the leave-one-out method.

**A**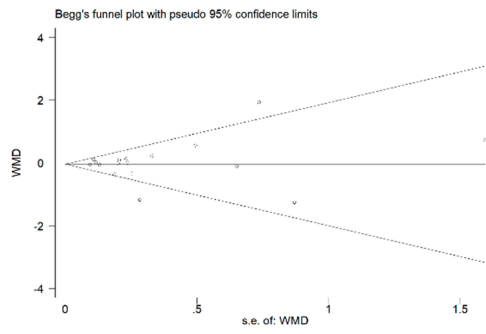**B**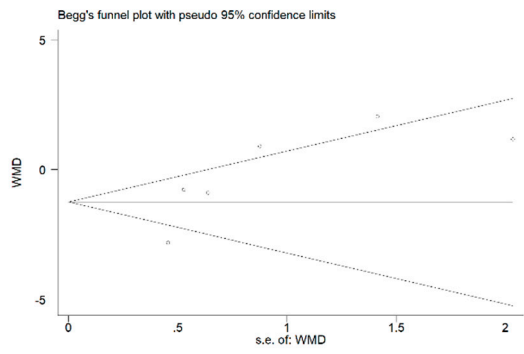**C**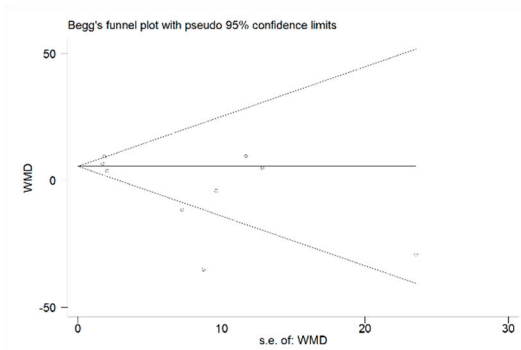**D**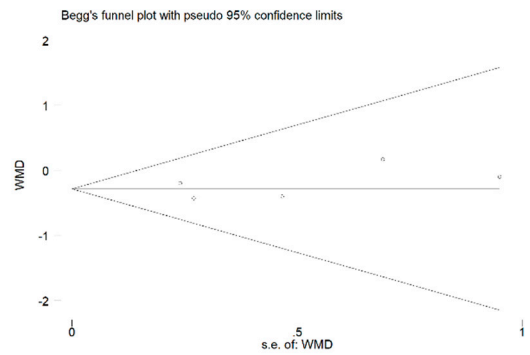**E**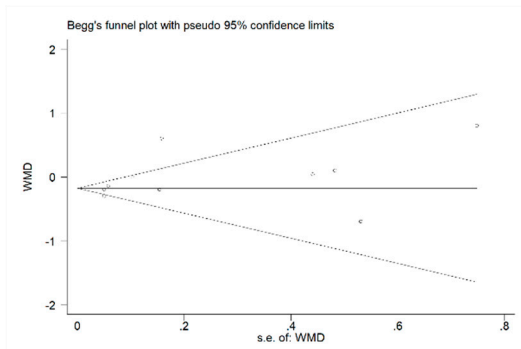**F**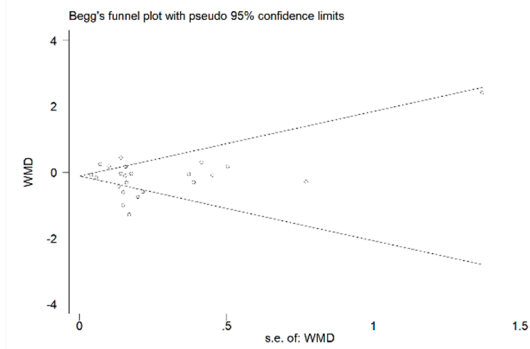**G**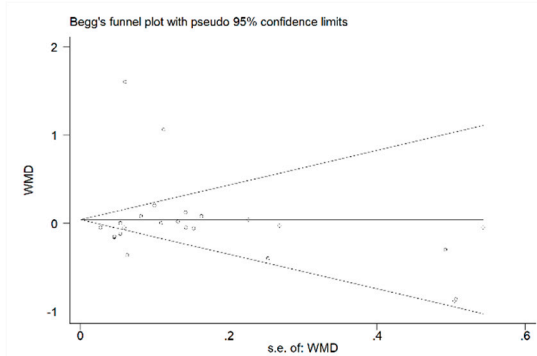**H**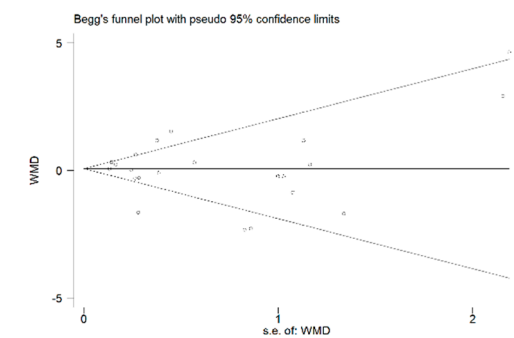

I

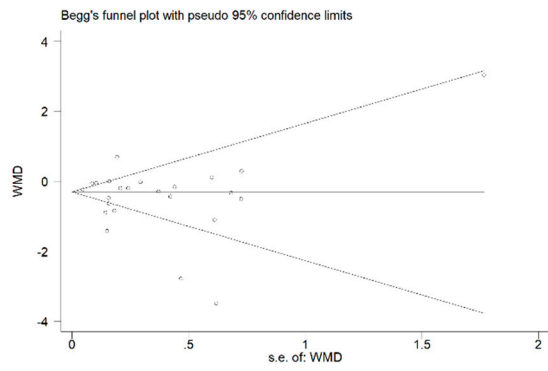

**Figure S3.** Funnel plots with pseudo 95% CIs for publication bias of FPG (A), 2hPBG (B), insulin (C), HOMA-IR (D), HbA1c (E), HDL-C (F), LDL-C (G), TG (H) and TC (I).
